# Supplementary material for: Electrophoretic adhesion of stimuli-responsive hydrogels
Source: Royal Society of Chemistry journal article supplement (doi:10.1039/c0cc01874k), 2010-01-01
Supplement: c0cc01874k.pdf [file c0cc01874k.pdf]

Supporting information for  
*Electrophoretic Adhesion of Stimuli-Responsive Hydrogels*

Taka-Aki Asoh and Akihiko Kikuchi\*

**1. Microscopic images of tensile test.**

a)

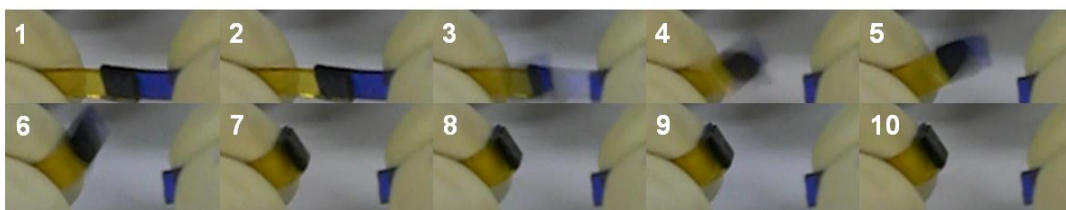

b)

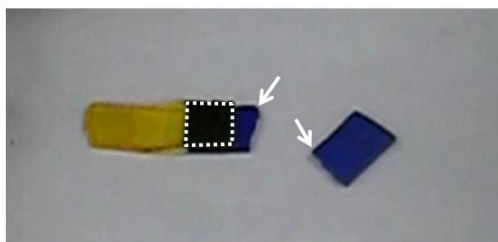

**Figure S1** (a) Successive picture of tensile test of adhered hydrogels. (b) Microscopic image of broken hydrogels. Arrows are broken point and white square is adhesion area. PAA and PEI semi-IPNs were stained by methylene blue and methyl orange, respectively.

**2. Adhesion and detachment of hydrogels.**

**Movie S1** shows adhesion and detachment of semi-IPNs by changing the polarity of the electric field. PAA and PEI semi-IPNs were stained by methylene blue and methyl orange, respectively. Two gels adhered when electric field was impressed in case of PEI-semi-IPNs on the anode and PAA semi-IPNs on the cathode, respectively. Detachment of adhered gels was observed by applying the inverse voltage.

### 3. End to end adhesion of gels

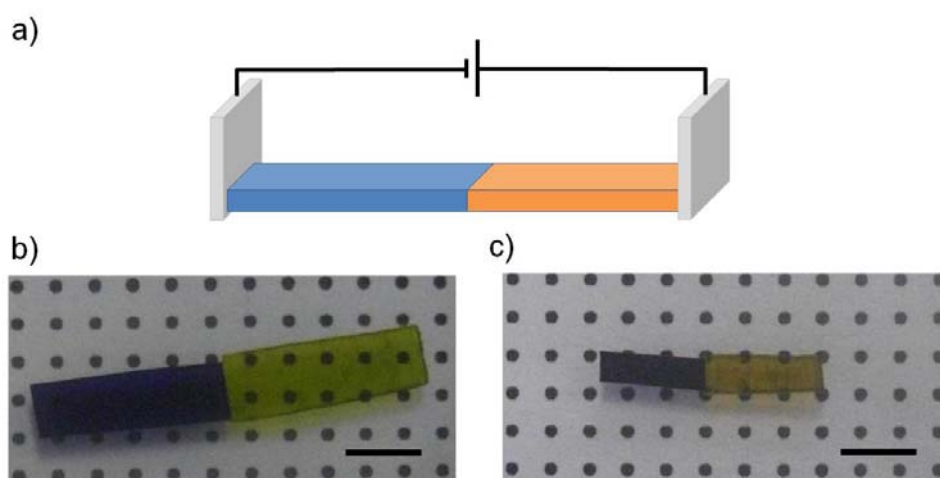

**Figure S2** (a) Schematic illustration of adhesion of end to end of the PAA semi-IPNs (anionic) and PEI semi-IPNs (cationic). Microscopic image of adhered hydrogels prepared by electrophoresis at b) 20 and c) 40°C, respectively. PAA and PEI semi-IPNs were stained by methylene blue and methyl orange, respectively. All scale bars are 4 mm.
